# Supplementary material for: Preparation of polycation with hydroxyls for enhanced delivery of miRNA in osteosarcoma therapy
Source: Royal Society of Chemistry journal article supplement (doi:10.1039/d2bm00253a), 2022-01-01
Supplement: d2bm00253a1.pdf [file d2bm00253a1.pdf]

## Supporting Information

### Preparation of polycation with hydroxyls for enhanced delivery of miRNA in osteosarcoma therapy†

Da-Fu Chen,<sup>‡a</sup> Bo-Wen Zhang,<sup>‡a</sup> Jingjing Cao,<sup>a</sup> Honggang Wang,<sup>a</sup> Peng Luo,<sup>a</sup>  
Weifeng Liu,<sup>\*b,c</sup> Xiaohui Niu,<sup>b,c</sup> Renxian Wang,<sup>a</sup> and Jing-Jun Nie<sup>\*a</sup>

<sup>a</sup> Laboratory of Bone Tissue Engineering, Beijing Laboratory of Biomedical Materials, Beijing Research Institute of Traumatology and Orthopaedics, Beijing Jishuitan Hospital. Beijing, 100035, China

<sup>b</sup> Department of Orthopaedic Oncology Surgery, Beijing Jishuitan Hospital, Peking University. Beijing, 100035, China

<sup>c</sup> Fourth Medical College of Peking University. Beijing, 100035, China

<sup>‡</sup> These two authors contributed equally to this work.

<sup>†</sup> Electronic supplementary information (ESI) is available from the RSC Publications website or the authors.

\* To whom correspondence should be addressed.

Email: niejingjun\_jst@126.com (J. J. Nie)

liuweifengjst@126.com (W. Liu)

**Table S1**  
**Polymer characterization**

| Sample              | Reaction time<br>(h) | $M_n$<br>(g/mol) <sup>c</sup> | PDI <sup>c</sup> | Monomer<br>repeat units <sup>c</sup> |
|---------------------|----------------------|-------------------------------|------------------|--------------------------------------|
| PGMA-1 <sup>a</sup> | 4                    | $8.1 \times 10^3$             | 1.21             | 56                                   |
| PGMA-2 <sup>b</sup> | 4                    | $11 \times 10^3$              | 1.18             | 76                                   |

<sup>a</sup> PGMA was synthesized at the feed ratio ([EBA]:[CuBr]:[PMDETA]:[GMA]) of 1:0.2:0.4:45 at room temperature with 90  $\mu$ L EBA initiator.

<sup>b</sup> PGMA was synthesized at the feed ratio ([EBA]:[CuBr]:[PMDETA]:[GMA]) of 1:0.2:0.4:60 at room temperature with 70  $\mu$ L EBA initiator.

<sup>c</sup> Determined from GPC. PDI=weight-average molecular weight/number -average molecular weight ( $M_w/M_n$ ).

**Table S2**  
**Sequences of mimics used in this study**

| <b>Species</b> | <b>Gene</b>          | <b>Sequence (5'-3')</b> |
|----------------|----------------------|-------------------------|
| Human          | miR-NC               | UUUGUACUACACAAAAGUACUG  |
|                | miR-223-3p (miR-223) | UGUCAGUUUGUCAAAUACCCCA  |

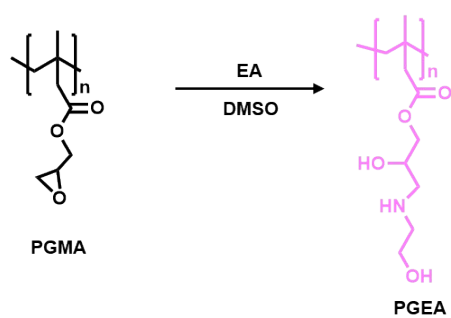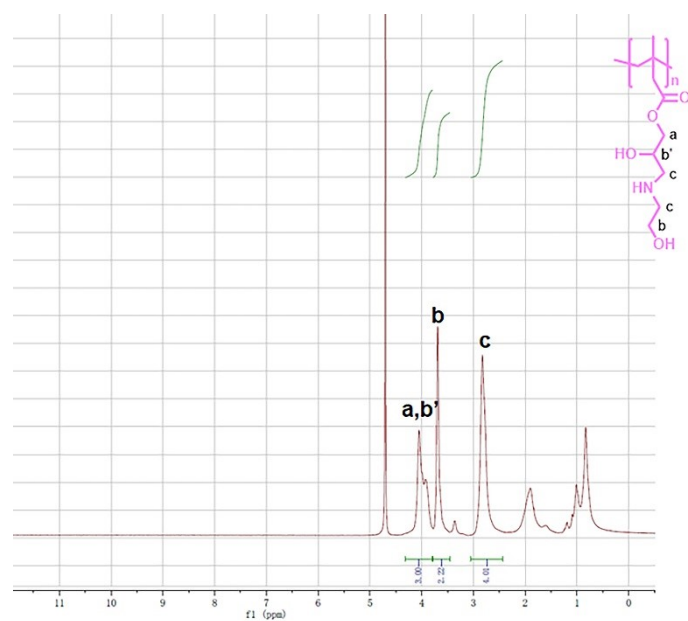

**Fig. S1.** Synthetic route and typical  $^1\text{H}$  NMR (400 MHz) spectra in  $\text{D}_2\text{O}$  of PGEA polycation.

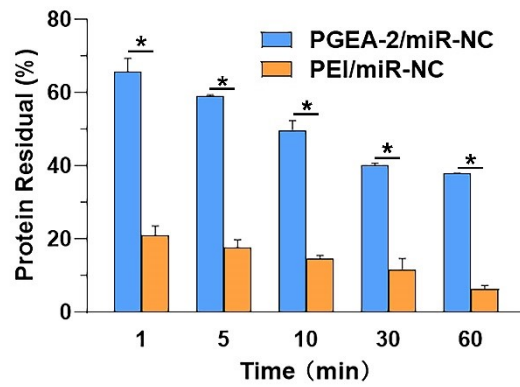

**Fig. S2.** Protein absorption assay of PGEA-2/miR-NC and PEI/miR-NC complexes treated with excess BSA. (\* $p < 0.05$ )

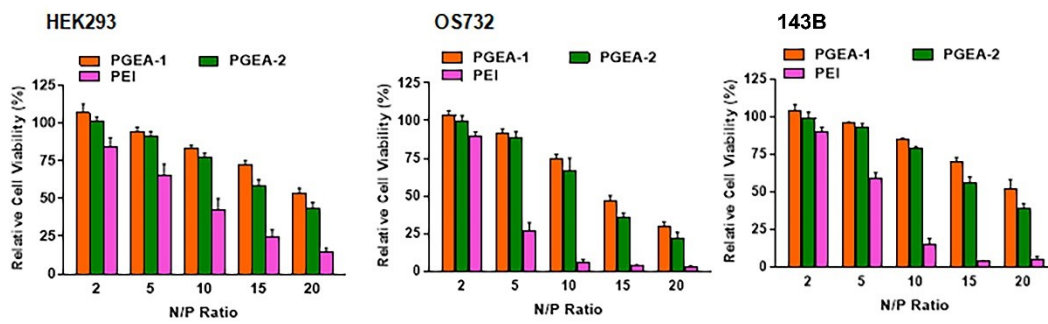

**Fig. S3.** Cytotoxicities in various cell lines after 24 h incubation with different vectors.

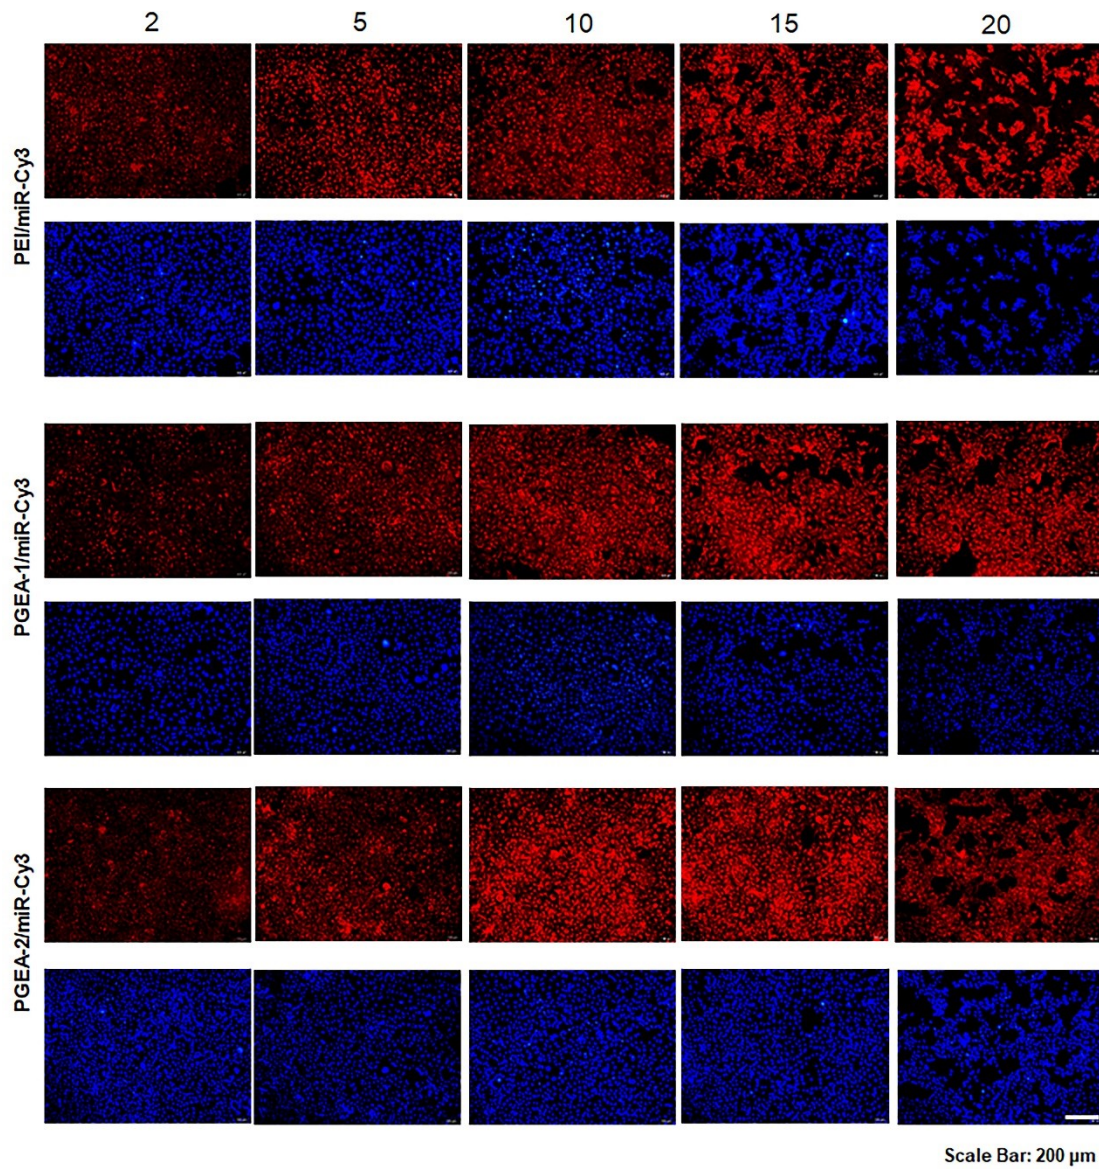

**Fig. S4.** Transfection efficiencies mediated by different vectors in HEK293 cells (Red: miR-Cy3; Blue: nucleus labeled with DAPI).

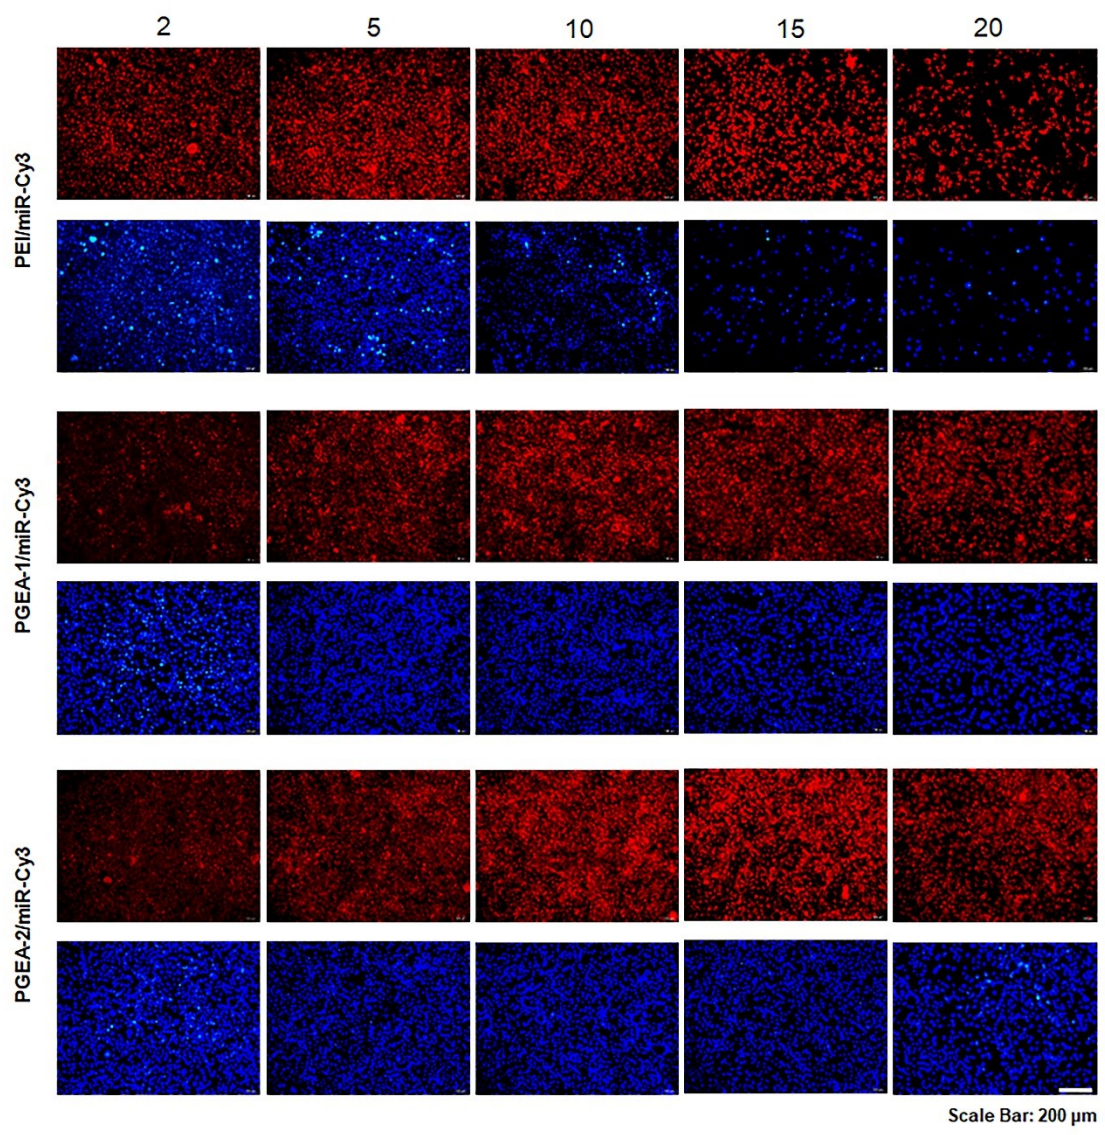

**Fig. S5.** Transfection efficiencies mediated by different vectors in OS732 cells (Red: miR-Cy3; Blue: nucleus labeled with DAPI).

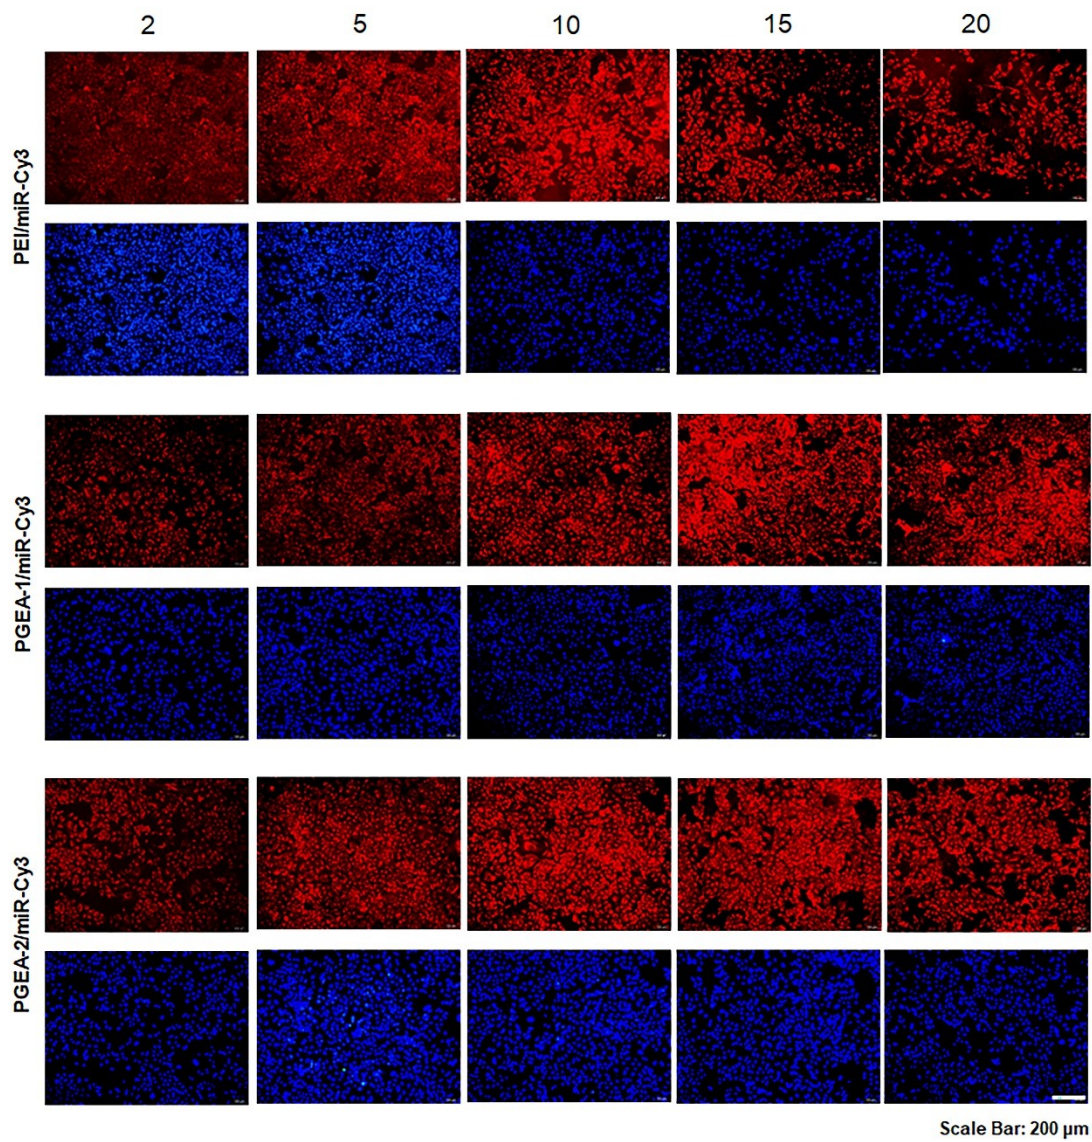

**Fig. S6.** Transfection efficiencies mediated by different vectors in 143B cells (Red: miR-Cy3; Blue: nucleus labeled with DAPI).



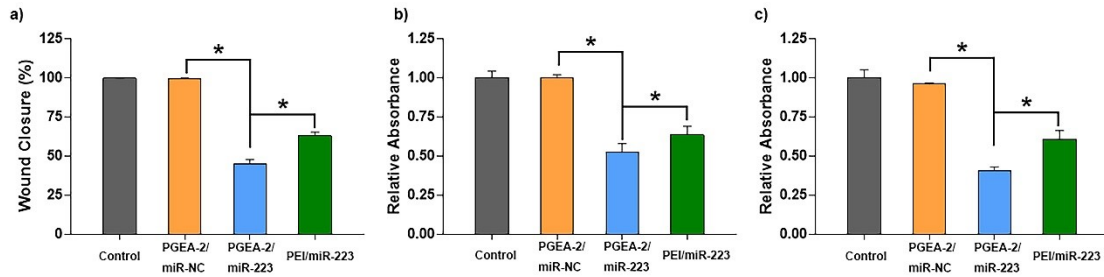

**Fig. S7.** Statistical analysis of a) wound healing, b) invasion and c) clonogenic assays in different treatment groups. (\* $p < 0.05$ )

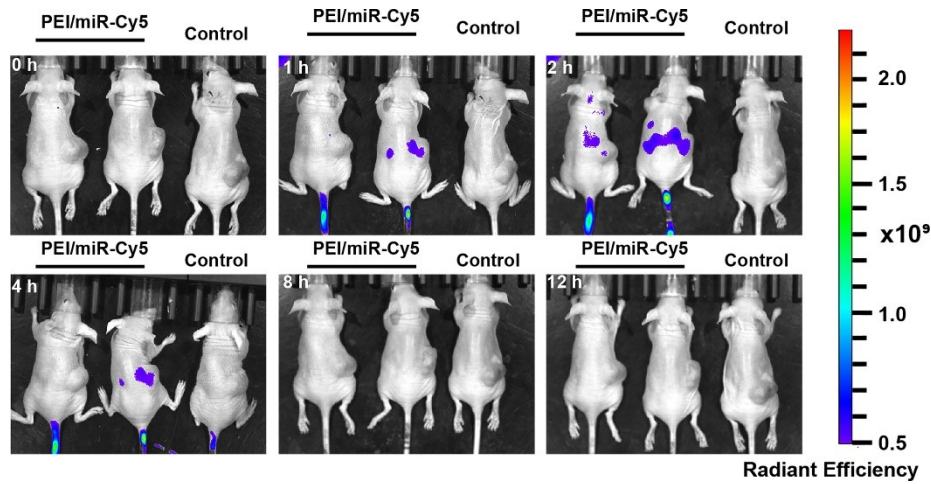

**Fig. S8.** The accumulation of PEI mediated miRNA delivery in mice with osteosarcoma.

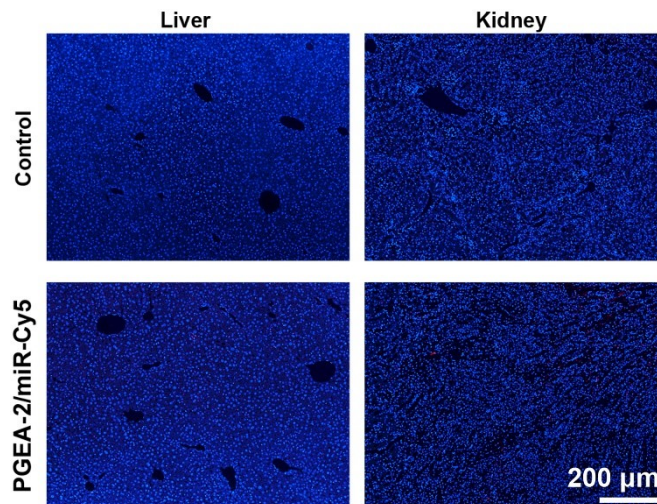

**Fig. S9.** Representative images show the accumulation of PGEA-2/miR-Cy5 system in mice liver and kidney after 12 h (Blue: nucleus stained with DAPI; Red: miR-Cy5).
